## CORRECTION

# Correction: Humans combine value learning and hypothesis testing strategically in multi-dimensional probabilistic reward learning

The *PLOS Computational Biology* Staff

The Funding information for this article is incomplete. The correct Funding statement is:

This work was supported by Grant R01DA042065 from the National Institute of Drug Abuse (YN), Grant W911NF-14-1-0101 from the Army Research Office (YN), and the World Premier International Research Center Initiative (WPI), MEXT, Japan (MBC). The funders had no role in study design, data collection and analysis, decision to publish, or preparation of the manuscript.

## Reference

1. Song M, Baah PA, Cai MB, Niv Y (2022) Humans combine value learning and hypothesis testing strategically in multi-dimensional probabilistic reward learning. *PLoS Comput Biol* 18(11): e1010699. <https://doi.org/10.1371/journal.pcbi.1010699> PMID: 36417419

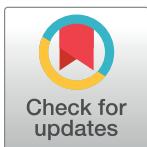

## OPEN ACCESS

**Citation:** The *PLOS Computational Biology* Staff (2022) Correction: Humans combine value learning and hypothesis testing strategically in multi-dimensional probabilistic reward learning. *PLoS Comput Biol* 18(12): e1010775. <https://doi.org/10.1371/journal.pcbi.1010775>

**Published:** December 13, 2022

**Copyright:** © 2022 The PLOS Computational Biology Staff. This is an open access article distributed under the terms of the [Creative Commons Attribution License](https://creativecommons.org/licenses/by/4.0/), which permits unrestricted use, distribution, and reproduction in any medium, provided the original author and source are credited.
